# Supplementary material for: Effects of harvesting and extraction methods on metabolite recovery from adherently growing mammalian cells
Source: Royal Society of Chemistry journal article supplement (doi:10.1039/c9ay02753j), 2020-01-01
Supplement: c9ay02753j1.pdf [file c9ay02753j1.pdf]

## **Effects of harvesting and extraction methods on metabolite recovery from adherently growing mammalian cells**

Yun Luo <sup>a,b</sup>, Ningbo Geng <sup>a</sup>, Baoqin Zhang <sup>a\*</sup>, Jiping Chen <sup>a</sup>, Haijun Zhang <sup>a</sup>

*<sup>a</sup>CAS Key Laboratory of Separation Sciences for Analytical Chemistry, Dalian Institute of Chemical Physics, Chinese Academy of Sciences, Dalian, Liaoning, 116023, China*

*<sup>b</sup>University of Chinese Academy of Sciences, Beijing 100049, China*

**\*Corresponding Author**

Phone: +86-411-8437-9972, E-mail: zhangbq08@dicp.ac.cn.@dicp.ac.cn.

## **Figure, table, and text Legends**

Text S1 Experimental procedures for cell preparation with the candidate methods for each step.

Text S2. UHPLC/Q-Trap MRM MS for targeted Metabolomic Analysis.

Figure. S1 Heat map of 67 metabolites with most significant change (PLS-DA, VIP > 1 and FDR < 0.05) among the different harvesting method groups.

Figure. S2 Heat map of 84 metabolites with most significant change (PLS-DA, VIP > 1 and FDR < 0.05) among the different extraction method groups.

Table S1 List of statistical results for differential metabolites harvested using four different harvesting methods

Table S2 List of statistical results for differential metabolites harvested using four different extraction methods

## **Text S1 Experimental procedures for cell harvesting and extraction**

### **Methods for cell harvesting**

For trypsin/EDTA treatment sample collection, after removing the cell culture medium, cells were rapidly washed twice with 2 mL PBS, and 200  $\mu$ L trypsin/EDTA solution was added to the plates. After incubation at room temperature for 2 min and tapping of the plates, 400  $\mu$ L medium and 400  $\mu$ L PBS were added to dilute the trypsin, and the media containing the detached cells was transferred into an Eppendorf tube. Next, the cell suspension was centrifuged at 1,000 $\times$ g and 4  $^{\circ}$ C for 10 min, the media was removed and the cell pellet was washed twice with 1 mL cold PBS to remove extracellular metabolites. Afterwards, PBS was removed by centrifugation (3,000 $\times$ g and 4  $^{\circ}$ C for 10 min), and cell pellets were immediately frozen in liquid nitrogen and stored at  $-80$   $^{\circ}$ C until analysis.

For scraping in PBS sample collection, after removing the cell culture medium, cells were rapidly washed twice with 2 mL PBS, then scraped with 1 mL PBS and the PBS containing the detached cells was transferred into an Eppendorf tube. Finally, the wells were washed one time with 0.5 mL PBS and the wash solution was added to the Eppendorf tube. After centrifugation at 3,000 $\times$ g and 4  $^{\circ}$ C for 10 min, the PBS was removed, and then cell pellets were immediately frozen in liquid nitrogen and stored at  $-80$   $^{\circ}$ C until analysis.

For direct solvent scraping sample collection, after removing the cell culture medium, cells were rapidly rinsed twice with 2 mL cold water and immediately frozen using liquid nitrogen. Approximately 5 s passed between addition of water and quenching by addition of liquid nitrogen. The quenched cells in plates were stored at  $-80$   $^{\circ}$ C until analysis. Afterwards, cells were scraped in the presence of 0.4 mL of ice-cold 80% methanol and transferred into an Eppendorf tube.

For water disruption sample collection, after removing the cell culture medium, cells were rapidly rinsed twice with 2 mL cold water and immediately frozen using liquid nitrogen. Approximately 5 s passed between addition of water and quenching by addition of liquid nitrogen. The quenched cells in plates were stored at  $-80$   $^{\circ}$ C until analysis. Then, 1 mL of ultrapure water was added to each well, followed by ultrasonic disruption in an ice-water bath for 3 min. Cells were disrupted in water and detached from the plates.

Afterwards, the suspension containing cell fragments was transferred into an Eppendorf tube. The freeze-drying of the samples was then performed for the disrupted cells.

The extraction steps were exactly the same in the four methods for cell harvesting. Cell samples were extracted with 0.4 mL of ice-cold 80% methanol including six internal standards (L-phenylalanine-d<sub>5</sub>, octanoyl (8,8,8-D<sub>3</sub>)-L-carnitine, 1-lauroyl-2-hydroxy-sn-glycero-3-phosphocholine, hendecanoic acid, nonadecanoic acid and 1,2-diheptadecanoyl-sn-glycero-3-phosphoethanolamine) which served as quality controls for sample preparation and instrumental analysis. First, the cell samples were sonicated for 3 min in an ice-water bath and vortexed for 2 min. Two cycles of sonicating / vortexing were performed. Then, centrifugation was performed for 10 min at 13,000 × g and 4 °C. Finally, the supernatant was filtered by an organic phase filter and transferred to a vial for metabolite analysis. The evaluation of cell harvesting methods was conducted with six duplicates for each method.

#### **Methods for metabolite extraction**

The steps for cell harvesting were exactly the same in the four methods for metabolite extraction. Cells were harvested via water disruption sample collection method and the details were described above. All the samples below were assayed within 10 min of extraction. In all the cases cold solvents, either -20 °C or ice cold, were employed to perform the extractions. The evaluation of metabolite extraction methods was conducted with four duplicates for each method.

For 80% methanol and 75% 9:1 MC extraction, 495 µL of organic solvent containing six internal standards was added and the same extraction procedure was performed (by the methods described above) as the extraction procedure in the study of different cell harvesting methods.

For pre-MTBE-based metabolomic extraction, freeze-dried cell samples were firstly ice-bath sonicated for 2 min with 120 µL 75% methanol including standards to break up the cells. Next, 300 µL MTBE was added and the samples were vortexed for 6 min at room temperature. The one-phase solvent system in this step allows for an optimal contact between extraction solvent and cell material. Next, phase separation was induced by adding 75 µL water and the samples were vortexed for 2 min at room temperature, letting sit for 10 min at room temperature and centrifuging for 10 min at 13,000 × g, 4 °C. Afterwards, 200 µL upper plus 100 µL lower fractions were pooled and evaporated before the samples were reconstituted in 300 µL 80% methanol.

For novel two-phase solvent system extraction procedure, freeze-dried cell samples were firstly vortexed for 3 min at room temperature and ice-bath sonicated for 3 min with 300  $\mu$ L MTBE to break up the cells. In this step, lipids and lipophilic metabolites can be extracted maximally to the MTBE phase. After being let sit for 10 min at 4 °C, cell samples sank to the bottom. Then, 105  $\mu$ L water was added to form two-phases solvent system and the samples were ice-bath sonicated for 2 min. Polar and semi-polar metabolites in this step are mainly extracted to the lower water phase. Next, 90  $\mu$ L methanol including internal standards was added and the samples were vortexed for 2 min at room temperature. Then, centrifugation was performed for 10 min at 13,000  $\times$  g, 4°C. 200  $\mu$ L upper plus 100  $\mu$ L lower fractions were pooled and evaporated before the samples were reconstituted in 300  $\mu$ L 80% methanol.

For comparison of pre-MTBE-based method and novel two-phase solvent system extraction with MTBE method, the methanol/water phase was injected into the LC-MS system directly and the MTBE-phase(100  $\mu$ L) were evaporated before the samples were dissolved in 50  $\mu$ L dichloromethane/ methanol (2:1) and finally resuspended (vortex for 2 min) in 50 $\mu$ L of 80% methanol before being transferred to a HPLC vial and injected into the LC-MS system.

### **Text S2. UHPLC/Q-Trap MRM MS for targeted Metabolomic Analysis**

A UHPLC/Q-Trap MS-based targeted metabolomic analysis was conducted multiple reaction monitoring (MRM) mode. The MRM ion pair informations were got from a pseudo-targeted metabolomic study based on HepG2 cell. Metabolite identification was carried out in reference to authentic standards or data from MS/MS libraries including HMDB (<http://www.hmdb.ca/>), METLIN (<https://metlin.scripps.edu/index.php>) and KEGG (<http://www.kegg.jp/kegg/>).

In positive ion mode, 10  $\mu$ L of extract containing metabolites was injected into the UHPLC/Q-Trap MS system with an ACQUITY UPLC BEH C8 column (2.1 mm  $\times$  100 mm  $\times$  1.7  $\mu$ m, Waters, USA) maintained at 50 °C. Water and acetonitrile both containing 0.1% (v/v) formic acid were used as mobile phases A and B, respectively. For comparison of cell harvesting methods, the flow rate was 0.35 mL/min, and the gradient elution was as follows (time, %B): 0 min, 10%; 3 min, 40%; 15 min, 100%, and maintained for 5 min; 20.1 min, 10%, and re-equilibrated for 2.9 min. For comparison of the extraction methods, the flow rate was 0.35 mL/min, and the gradient elution was as follows (time, %B): 0 min,

5%; 1 min, 5%; 23 min, 100%, and maintained for 4 min; 27.1 min, 5%, and re-equilibrated for 2.9 min. The MS instrumental parameters were set as follows: source temperature, 550 °C; gas I, 40 arbitrary units; gas II, 40 arbitrary units; curtain gas, 35 arbitrary units; ion spray voltage, 5500 V. Four internal standards containing lysphosphatidyl cholines LPC (12: 0), phosphatidyl ethanolamine PE (17: 0), octanoyl (8,8,8-D3)-L-carnitine, and L-phenylalanine-d5 were used for normalizing the peak areas of all other analytes.

In negative ion mode, 10 µL of extract containing metabolites was injected into the UHPLC/Q-Trap MS system with an ACQUITY UPLC HSS T3 column (2.1 mm × 100 mm × 1.8 µm, Waters, USA) maintained at 50 °C. Water and methanol both containing 5 mmol/L ammonium bicarbonate were used as mobile phases A and B, respectively. The flow rate was also 0.35 mL/min, and the gradient elution was as follows (time, %B): 0 min, 2%; 3 min, 42%; 12 min, 100%, and maintained for 4 min; 16.1 min, 2%, and re-equilibrated for 3.9 min. The MS instrumental parameters were set as follows: source temperature, 550 °C; gas I, 40 arbitrary units; gas II, 40 arbitrary units; curtain gas, 35 arbitrary units; ion spray voltage, -4500 V. Octanoyl (8,8,8-D3)-L-carnitine, L-phenylalanine-d5, hendecanoic acid and nonadecanoic acid served as internal standards to normalize the peak areas of all other analytes.

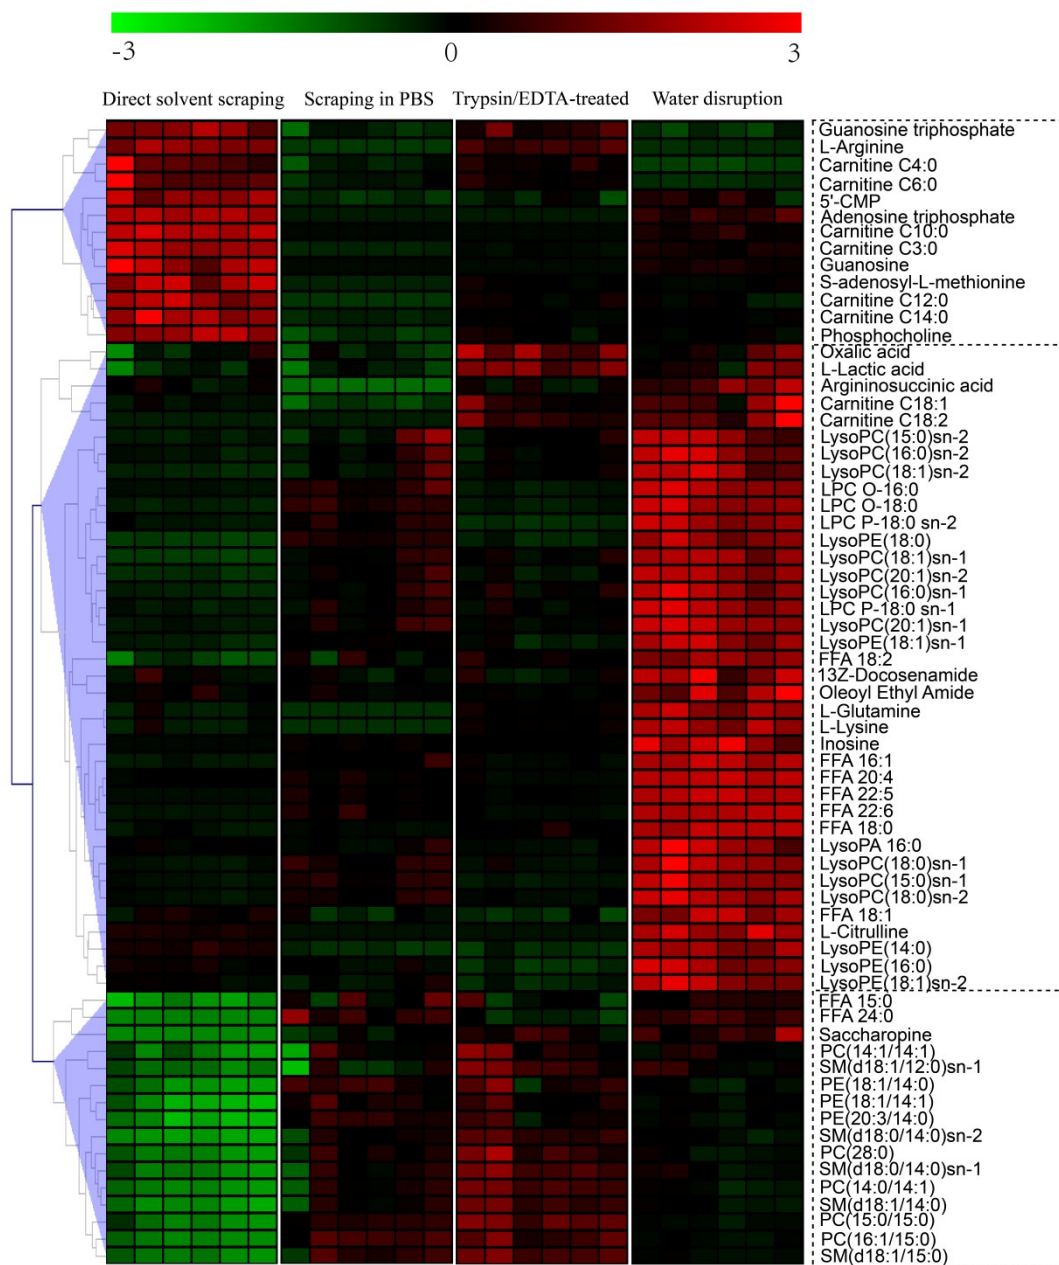

**Figure. S1 Heat map of 67 metabolites with most significant change (PLS-DA, VIP > 1 and FDR < 0.05) among the different harvesting method groups.**

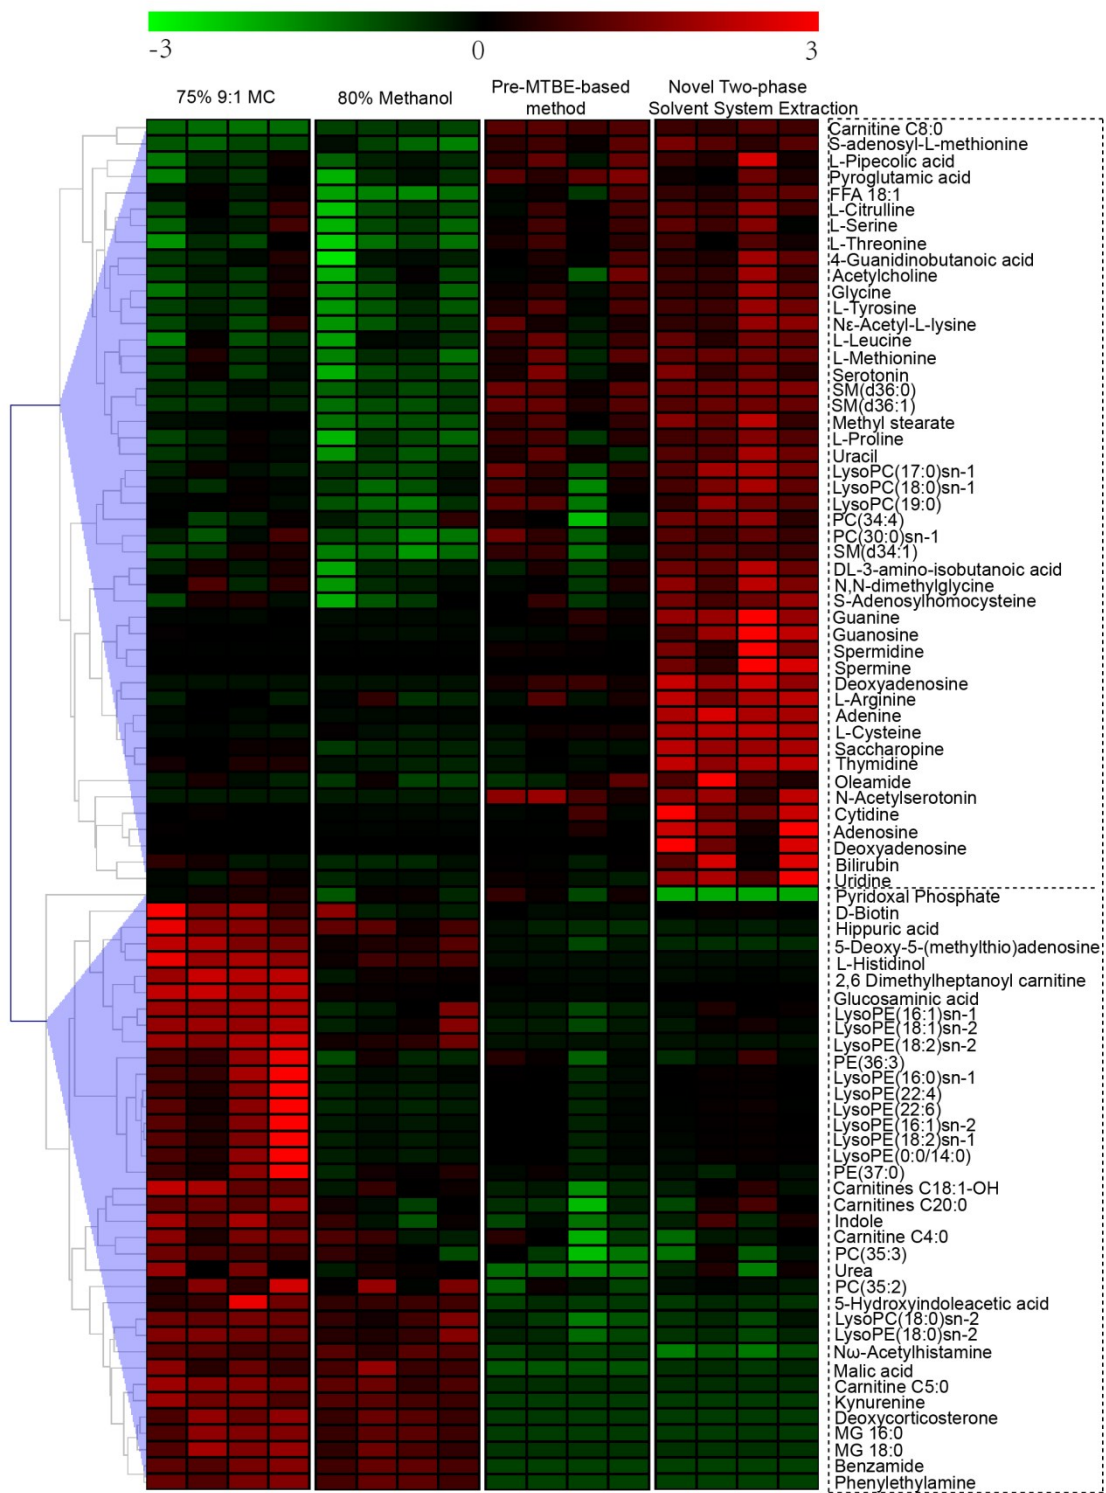

**Figure. S2 Heat map of 84 metabolites with most significant change (PLS-DA, VIP > 1 and FDR < 0.05) among the different extraction method groups.**



**Table S1 List of statistical results for differential metabolites harvested using four different harvesting methods**

| <b>Metabolites</b>      | <b>Parent Ion</b> | <b>Product Ion</b> | <b>VIP</b> | <b>P</b> | <b>FDR</b> |
|-------------------------|-------------------|--------------------|------------|----------|------------|
| Adenosine triphosphate  | 505.9875          | 408.0105           | 1.0137     | 1.01E-16 | 2.46E-15   |
| PC(16:1/15:0)           | 718.538           | 184.073            | 1.0345     | 9.49E-11 | 2.18E-10   |
| PE(18:1/14:0)           | 690.507           | 549.488            | 1.0409     | 3.03E-07 | 4.12E-07   |
| LysoPE(14:0)            | 426.262           | 285.242            | 1.0573     | 1.62E-14 | 1.25E-13   |
| PC(15:0/15:0)           | 706.538           | 184.073            | 1.0752     | 3.14E-11 | 7.84E-11   |
| 5'-CMP                  | 322.0426          | 78.9586            | 1.076      | 2.07E-09 | 3.71E-09   |
| Oxalic acid             | 88.9875           | 44.9977            | 1.096      | 1.24E-04 | 1.39E-04   |
| SM(d18:1/15:0)          | 689.56            | 184.073            | 1.1189     | 7.97E-10 | 1.63E-09   |
| LysoPE(16:0)            | 454.293           | 313.274            | 1.1547     | 6.74E-11 | 1.57E-10   |
| FFA 18:1                | 281.2492          | 281.2492           | 1.191      | 7.56E-10 | 1.57E-09   |
| PC(28:0)                | 678.507           | 184.073            | 1.1913     | 1.16E-07 | 1.63E-07   |
| Carnitine C3:0          | 218.139           | 85.0284            | 1.2045     | 9.96E-15 | 8.06E-14   |
| Phosphocholine          | 184.073           | 86.0966            | 1.2079     | 3.38E-13 | 1.69E-12   |
| L-Arginine              | 175.1187          | 70.0658            | 1.209      | 3.30E-16 | 5.86E-15   |
| Argininosuccinic acid   | 289.1124          | 271.103            | 1.2112     | 2.85E-08 | 4.29E-08   |
| PC(14:0/14:1)           | 676.491           | 184.073            | 1.2356     | 3.72E-09 | 6.39E-09   |
| PC(14:1/14:1)           | 674.476           | 184.073            | 1.2467     | 4.91E-04 | 5.35E-04   |
| PE(20:3/14:0)           | 714.507           | 573.488            | 1.2548     | 3.29E-10 | 7.17E-10   |
| L-Lactic acid           | 89.024            | 43.0196            | 1.2625     | 1.95E-05 | 2.34E-05   |
| Carnitine C12:0         | 344.2803          | 85.0284            | 1.2699     | 2.93E-12 | 9.98E-12   |
| Guanosine triphosphate  | 521.9797          | 158.9248           | 1.2779     | 6.17E-09 | 1.02E-08   |
| L-Citrulline            | 176.1019          | 70.0657            | 1.2865     | 5.55E-14 | 3.78E-13   |
| SM(d18:0/14:0)sn-1      | 677.559           | 184.073            | 1.2968     | 6.46E-08 | 9.24E-08   |
| PE(18:1/14:1)           | 688.491           | 547.472            | 1.3151     | 8.92E-09 | 1.43E-08   |
| SM(d18:1/14:0)          | 675.544           | 184.073            | 1.3179     | 5.84E-09 | 9.73E-09   |
| Guanosine               | 152.0564          | 135.03             | 1.3184     | 1.04E-09 | 2.06E-09   |
| Carnitine C18:1         | 426.358           | 85.0284            | 1.327      | 2.98E-04 | 3.29E-04   |
| LysoPE(18:1)sn-2        | 480.308           | 339.289            | 1.3278     | 3.66E-10 | 7.78E-10   |
| FFA 24:0                | 309.2779          | 309.2779           | 1.3418     | 3.99E-10 | 8.37E-10   |
| Oleoyl Ethyl Amide      | 310.3097          | 69.0705            | 1.3484     | 4.14E-06 | 5.06E-06   |
| Carnitine C14:0         | 372.311           | 85.029             | 1.3501     | 3.02E-12 | 1.01E-11   |
| S-adenosyl-L-methionine | 399.1434          | 250.0929           | 1.3506     | 3.70E-11 | 8.87E-11   |
| LPC P-18:0 sn-2         | 508.376           | 104.107            | 1.3597     | 1.39E-12 | 4.94E-12   |
| Carnitine C4:0          | 232.1555          | 85.0296            | 1.3695     | 1.58E-05 | 1.91E-05   |
| Carnitine C6:0          | 260.186           | 85.03              | 1.3763     | 4.61E-05 | 5.48E-05   |
| 13Z-Docosamide          | 338.342           | 69.0711            | 1.3986     | 6.94E-07 | 9.00E-07   |
| SM(d18:0/14:0)sn-2      | 677.559           | 184.073            | 1.4006     | 4.57E-11 | 1.08E-10   |
| SM(d18:1/12:0)sn-1      | 647.5             | 184.073            | 1.4022     | 4.93E-05 | 5.83E-05   |

|                  |          |          |        |          |          |
|------------------|----------|----------|--------|----------|----------|
| Carnitine C10:0  | 316.2478 | 85.029   | 1.4056 | 6.24E-17 | 1.77E-15 |
| LysoPA 16:0      | 409.4825 | 153.1    | 1.4167 | 1.75E-08 | 2.73E-08 |
| LysoPC(15:0)sn-2 | 482.324  | 184.073  | 1.424  | 1.23E-04 | 1.39E-04 |
| FFA 15:0         | 241.2171 | 241.2171 | 1.4283 | 2.81E-06 | 3.46E-06 |
| LPC O-16:0       | 482.361  | 104.107  | 1.4297 | 2.04E-11 | 5.33E-11 |
| LysoPC(15:0)sn-1 | 482.324  | 184.073  | 1.4891 | 4.47E-12 | 1.36E-11 |
| LPC O-18:0       | 510.392  | 104.107  | 1.5257 | 1.64E-13 | 9.03E-13 |
| LysoPC(16:0)sn-2 | 496.34   | 184.073  | 1.5372 | 3.36E-07 | 4.54E-07 |
| Inosine          | 267.0719 | 135.0298 | 1.5553 | 1.95E-09 | 3.61E-09 |
| LysoPC(18:0)sn-1 | 524.371  | 184.073  | 1.5614 | 1.20E-10 | 2.69E-10 |
| FFA 20:4         | 303.2311 | 303.2311 | 1.5867 | 2.97E-19 | 2.52E-17 |
| LysoPE(18:0)     | 482.324  | 341.305  | 1.5919 | 1.65E-13 | 9.03E-13 |
| LysoPC(18:0)sn-2 | 524.371  | 184.073  | 1.6067 | 8.64E-13 | 3.58E-12 |
| Carnitine C18:2  | 424.342  | 85.0284  | 1.6273 | 5.27E-05 | 6.18E-05 |
| LysoPC(18:1)sn-2 | 522.355  | 184.073  | 1.6293 | 6.13E-07 | 8.07E-07 |
| LysoPE(18:1)sn-1 | 480.308  | 339.289  | 1.6302 | 5.20E-12 | 1.55E-11 |
| LysoPC(20:1)sn-1 | 550.387  | 184.073  | 1.6441 | 3.18E-11 | 7.84E-11 |
| FFA 22:6         | 327.2349 | 327.2349 | 1.6523 | 1.54E-17 | 5.22E-16 |
| FFA 22:5         | 329.2461 | 329.2461 | 1.6611 | 4.22E-20 | 7.17E-18 |
| LPC P-18:0 sn-1  | 508.376  | 104.107  | 1.6622 | 1.68E-10 | 3.70E-10 |
| LysoPC(20:1)sn-2 | 550.387  | 184.073  | 1.6877 | 2.27E-11 | 5.77E-11 |
| L-Lysine         | 147.113  | 84.0808  | 1.692  | 5.12E-13 | 2.29E-12 |
| L-Glutamine      | 147.0762 | 84.0448  | 1.6985 | 1.25E-12 | 4.93E-12 |
| FFA 16:1         | 253.2172 | 253.2172 | 1.7002 | 7.20E-15 | 6.45E-14 |
| LysoPC(16:0)sn-1 | 496.34   | 184.073  | 1.7314 | 6.34E-09 | 1.04E-08 |
| FFA 18:0         | 283.2645 | 283.2645 | 1.7581 | 1.06E-17 | 4.49E-16 |
| Saccharopine     | 275.1255 | 257.1147 | 1.8353 | 9.52E-08 | 1.35E-07 |
| LysoPC(18:1)sn-1 | 522.355  | 184.073  | 1.8428 | 1.26E-11 | 3.51E-11 |
| FFA 18:2         | 279.2336 | 279.2336 | 1.8752 | 1.65E-09 | 3.11E-09 |

**Table S2 List of statistical results for differential metabolites harvested using four different extraction methods**

| <b>Metabolites</b>              | <b>Parent Ion</b> | <b>Product Ion</b> | <b>VIP</b> | <b>P</b>  | <b>FDR</b> |
|---------------------------------|-------------------|--------------------|------------|-----------|------------|
| Phenylethylamine                | 122.0969          | 105.0708           | 1.8399     | 4.15E-10  | 1.45E-08   |
| 2,6 Dimethylheptanoyl carnitine | 302.2330          | 100.1120           | 1.6103     | 3.14E-10  | 1.45E-08   |
| 4-Guanidinobutanoic acid        | 146.0916          | 87.0446            | 1.1248     | 0.030627  | 0.045067   |
| 5-Deoxy-5-(methylthio)adenosine | 298.0980          | 136.0616           | 1.8306     | 1.13E-06  | 1.14E-05   |
| 5-Hydroxyindoleacetic acid      | 192.0637          | 91.0543            | 1.6504     | 0.0004359 | 0.0020225  |
| Acetylcholine                   | 146.1177          | 87.0448            | 1.169      | 0.034353  | 0.048895   |

|                             |          |          |        |           |           |
|-----------------------------|----------|----------|--------|-----------|-----------|
| Adenine                     | 136.0619 | 119.0359 | 1.5825 | 6.91E-11  | 4.01E-09  |
| Adenosine                   | 268.1040 | 136.0611 | 1.3422 | 0.0013987 | 0.0051508 |
| Benzamide                   | 122.0595 | 79.0545  | 1.8336 | 6.52E-10  | 1.68E-08  |
| Bilirubin                   | 585.2703 | 299.1389 | 1.1441 | 0.00546   | 0.012667  |
| Carnitine C4:0              | 232.1555 | 85.0296  | 1.3443 | 0.024693  | 0.037689  |
| Carnitine C5:0              | 246.1700 | 85.0648  | 1.8744 | 1.57E-09  | 3.64E-08  |
| Carnitine C8:0              | 288.2170 | 85.0284  | 1.8312 | 9.68E-12  | 1.12E-09  |
| Carnitine C18:1-OH          | 442.4000 | 85.1000  | 1.3422 | 0.0003166 | 0.0016324 |
| Carnitine C20:0             | 456.4000 | 85.1000  | 1.0419 | 0.0020644 | 0.006386  |
| Cytidine                    | 244.0924 | 112.0512 | 1.4461 | 0.0001881 | 0.0010389 |
| D-Biotin                    | 245.0956 | 227.0849 | 1.2622 | 0.0085028 | 0.016717  |
| Deoxyadenosine              | 252.1081 | 136.0622 | 1.2371 | 0.006251  | 0.013812  |
| Deoxycorticosterone         | 331.2252 | 109.0645 | 1.8431 | 3.73E-08  | 5.77E-07  |
| Deoxyguanosine              | 268.1031 | 152.0558 | 1.7745 | 2.05E-08  | 3.39E-07  |
| DL-3-amino-isobutanoic acid | 104.0693 | 45.0331  | 1.1918 | 0.0008975 | 0.0037182 |
| FFA 18:1                    | 283.2645 | 265.2505 | 1.0245 | 2.49E-05  | 0.0001861 |
| Glucosaminic acid           | 196.0812 | 72.0444  | 1.5914 | 3.46E-13  | 8.02E-11  |
| Glycine                     | 76.0399  | 30.0344  | 1.4754 | 0.0014929 | 0.0053285 |
| Guanine                     | 152.0564 | 135.0300 | 1.5834 | 2.38E-06  | 2.30E-05  |
| Guanosine                   | 284.0983 | 152.0557 | 1.4143 | 4.16E-05  | 0.0002757 |
| Hippuric acid               | 180.0650 | 77.0392  | 1.7338 | 3.01E-05  | 0.0002113 |
| Indole                      | 118.0646 | 65.0386  | 1.1219 | 0.0014913 | 0.0053285 |
| Kynurenine                  | 209.0916 | 192.0653 | 1.8568 | 3.36E-09  | 7.08E-08  |
| L-Arginine                  | 175.1187 | 70.0658  | 1.5943 | 4.61E-05  | 0.000297  |
| L-Citrulline                | 176.1019 | 70.0657  | 1.2194 | 0.0018819 | 0.0060488 |
| L-Cysteine                  | 122.0289 | 76.0223  | 1.6693 | 4.37E-10  | 1.45E-08  |
| L-Histidinol                | 142.0992 | 81.0452  | 1.7864 | 2.77E-07  | 3.38E-06  |
| L-Leucine                   | 132.1019 | 86.0967  | 1.5368 | 0.0049477 | 0.011871  |
| L-Methionine                | 150.0574 | 133.0314 | 1.4338 | 0.0004222 | 0.0019991 |
| L-Pipecolic acid            | 130.0859 | 84.0811  | 1.3813 | 0.021696  | 0.034242  |
| L-Proline                   | 116.0708 | 70.0659  | 1.3329 | 0.0004909 | 0.0021089 |
| L-Serine                    | 106.0496 | 60.0454  | 1.1234 | 0.0047226 | 0.011533  |
| L-Threonine                 | 120.0653 | 74.0605  | 1.326  | 0.0009264 | 0.0037708 |
| L-Tyrosine                  | 182.0864 | 136.0753 | 1.5034 | 0.0001454 | 0.0008226 |
| LysoPC 17:0 sn-1            | 510.3550 | 184.0730 | 1.4498 | 0.0012495 | 0.0046757 |
| LysoPC 18:0 sn-1            | 524.3710 | 184.0730 | 1.2704 | 0.00375   | 0.0098864 |
| LysoPC 18:0 sn-2            | 524.3710 | 184.0730 | 1.6852 | 5.58E-06  | 4.92E-05  |
| LysoPC 19:0                 | 538.3870 | 184.0730 | 1.102  | 0.0049632 | 0.011871  |
| LysoPE 16:0 sn-1            | 454.2930 | 313.2740 | 1.1363 | 0.0035029 | 0.0094496 |
| LysoPE 16:1 sn-1            | 452.2770 | 311.2608 | 1.4056 | 0.0001156 | 0.0006703 |
| LysoPE 16:1 sn-2            | 452.2770 | 311.2608 | 1.0851 | 0.0076285 | 0.015662  |
| LysoPE 18:0 sn-2            | 482.3240 | 341.3050 | 1.763  | 4.46E-06  | 4.14E-05  |
| LysoPE 18:1 sn-2            | 480.3080 | 339.2890 | 1.4783 | 0.0001142 | 0.0006703 |

|                         |          |          |        |           |           |
|-------------------------|----------|----------|--------|-----------|-----------|
| LysoPE 18:2 sn-1        | 478.2940 | 337.2740 | 1.0862 | 0.0061968 | 0.013812  |
| LysoPE 18:2 sn-2        | 478.2940 | 337.2740 | 1.7805 | 7.09E-07  | 7.91E-06  |
| LysoPE 22:4             | 530.3240 | 44.0495  | 1.0227 | 0.0079767 | 0.015817  |
| LysoPE 22:6             | 526.2930 | 385.2740 | 1.0195 | 0.0060302 | 0.013583  |
| LysoPE(0:0/14:0)        | 426.2620 | 285.2420 | 1.0766 | 0.0067081 | 0.014278  |
| Malic acid              | 135.0958 | 89.0229  | 1.5692 | 5.73E-06  | 4.92E-05  |
| Methyl stearate         | 299.2935 | 57.0698  | 1.4062 | 1.31E-05  | 0.0001089 |
| MG 16:0                 | 331.2840 | 57.0699  | 1.8597 | 3.92E-09  | 7.58E-08  |
| MG 18:0                 | 359.3160 | 95.0860  | 1.8434 | 1.73E-07  | 2.22E-06  |
| N,N-dimethylglycine     | 104.0704 | 58.0061  | 1.0515 | 0.0016135 | 0.0053477 |
| N-Acetylserotonin       | 219.1102 | 160.0714 | 1.6696 | 0.0002396 | 0.0012782 |
| Nε-Acetyl-L-lysine      | 189.1228 | 84.0810  | 1.3668 | 0.0027702 | 0.0083421 |
| Nω-Acetylhistamine      | 154.0972 | 112.0871 | 1.8591 | 1.02E-08  | 1.82E-07  |
| Oleamide                | 282.2787 | 69.0711  | 1.172  | 0.030886  | 0.045067  |
| PC 30:0 sn-1            | 706.5380 | 184.0730 | 1.0898 | 0.0057806 | 0.013148  |
| PC 34:4                 | 754.5380 | 184.0730 | 1.0005 | 0.014402  | 0.025505  |
| PC 35:2                 | 772.5850 | 184.0730 | 1.3203 | 0.017597  | 0.029025  |
| PC 35:3                 | 770.5690 | 184.0730 | 1.329  | 0.0089699 | 0.017198  |
| PE 36:3                 | 742.5380 | 601.5190 | 1.0075 | 0.01093   | 0.020285  |
| PE 37:0                 | 762.6010 | 621.5820 | 1.2781 | 0.018901  | 0.030664  |
| Pyridoxal Phosphate     | 248.0311 | 150.0529 | 1.4936 | 2.91E-05  | 0.0002109 |
| Pyroglutamic acid       | 129.8750 | 84.0980  | 1.2099 | 0.0036073 | 0.0096196 |
| Saccharopine            | 277.1386 | 84.0811  | 1.3946 | 3.02E-11  | 2.33E-09  |
| S-Adenosylhomocysteine  | 385.1287 | 136.0619 | 1.1751 | 0.0016088 | 0.0053477 |
| S-adenosyl-L-methionine | 399.1434 | 250.0929 | 1.7528 | 2.00E-05  | 0.000155  |
| Serotonin               | 177.1020 | 160.0756 | 1.326  | 0.0015427 | 0.005342  |
| SM 34:1                 | 703.5750 | 184.0730 | 1.0673 | 0.001173  | 0.0045356 |
| SM 36:0                 | 733.6220 | 184.0730 | 1.6866 | 7.16E-07  | 7.91E-06  |
| SM 36:1                 | 731.6060 | 184.0730 | 1.6802 | 8.14E-08  | 1.18E-06  |
| Spermidine              | 146.1645 | 72.0812  | 1.295  | 0.0066881 | 0.014278  |
| Spermine                | 203.2230 | 112.1122 | 1.3265 | 0.0011324 | 0.0045298 |
| Thymidine               | 243.0991 | 127.0499 | 1.3447 | 5.97E-10  | 1.68E-08  |
| Uracil                  | 113.0348 | 70.0299  | 1.4027 | 0.0002424 | 0.0012782 |
| Urea                    | 61.0396  | 44.0131  | 1.1176 | 0.0042185 | 0.010638  |
| Uridine                 | 245.0770 | 113.0349 | 1.3282 | 9.09E-05  | 0.000555  |
